# Supplementary material for: Development of a new genotype–phenotype linked antibody screening system
Source: eLife. 2024 Nov 19;13:RP95346. doi: 10.7554/eLife.95346 (PMC11575895; doi:10.7554/eLife.95346)
Supplement: Supplementary file 1. — (a) Oligonucleotides. (b) Oligonucleotides. [file elife-95346-supp1.docx]

Supplementary Tables

**Supplementary File 1a. Oligonucleotides**

| Primer | Application | Sequence |
| --- | --- | --- |
| First-strand cDNA synthesis | | |
| Oligo(dT)18 | Primer for cDNA synthesis | TTTTTTTTTTTTTTTTTT |
| Second-strand cDNA synthesis | | |
| SMART_dT | TdT oligo | AAGCAGTGGTATCAACGCAGAGTAC(T)30VN |
| Mouse IGH/IGK primer | |  |
| TdT_L_BsaI_heavy | mouse IgG heavy-chain cDNA | CTAGGGTCTCAAGCAGTGGTATCAACGCAGAGTAC |
| msVHE | GAGGTGCAGCTGCAGGAGTCTGG |
| W-gamma-outer | AGAAGGTGTGCACACCGCTGGAC |
| mC_G new2 | ATCTCCACACACAGGGGCCAGTGGATAGAC |
| BsaI_IL6sp_L | CTAGGGTCTCAAGCAGATGAACTCCTTCTCCACAAGCG |
| mC_G_new2_BsaI | TCCTAGGTCTCCCACACACAGGGGCCAGTGGATAGAC |
| TdT_L_BsaI_light | mouse IgK light-chain cDNA | CTAGGGTCTCAGTGGTATCAACGCAGAGTAC |
| mvkappa | GAYATTGTGMTSACMCARWCTMCA |
| mCkappa-outer | ACTGAGGCACCTCCAGATGTT |
| mC_K_new | AGGCACCTCCAGATGTTAACTGCTCACTGG |
| BsaI_IL6sp_kappa_L | CTAGGGTCTCAGTGGTATGAACTCCTTCTCCACAAGCG |
| mC_K_new_BsaI | TCCTAGGTCTCCTCCAGATGTTAACTGCTCACTGG |

**Supplementary File 1b. Oligonucleotides**

| Primer | Application | Sequence |
| --- | --- | --- |
| Next Generation sequencing | | |
| M13fwd_i5_mC_G_new2a | Well index | TGTAAAACGACGGCCxxxxxxxxATCTCCACACACAGGGGCCAGTGGATAGAC |
| M13fwd_i5_mC_Ka | TGTAAAACGACGGCCxxxxxxxxGCACCTCCAGATGTTAACTG |
| M13fwd_i5_mC_La | TGTAAAACGACGGCCxxxxxxxxAGCTCCTCAGRGGAAGGTG |
| M13rev_i7_msVHEb | GGAAACAGCTATGACyyyyyyyyGAGGTGCAGCTGCAGGAGTCTGG |
| M13rev_ i7_mvkappab | GGAAACAGCTATGACyyyyyyyyGAYATTGTGMTSACMCARWCTMCA |
| i5-Fwdc | Plate index | AATGATACGGCGACCACCGAGATCTACACxxxxxxxx  ACACTCTTTCCCTACACGACGCTCTTCCGATCTTGTAAAACGACGGCC |
| i7-Revd | CAAGCAGAAGACGGCATACGAGATyyyyyyyy  GTGACTGGAGTTCAGACGTGTGCTCTTCCGATCTGGAAACAGCTATGAC |
| i5-Revc | AATGATACGGCGACCACCGAGATCTACACxxxxxxxx  ACACTCTTTCCCTACACGACGCTCTTCCGATCTGGAAACAGCTATGAC |
| i7-Fwdd | CAAGCAGAAGACGGCATACGAGATyyyyyyyy  GTGACTGGAGTTCAGACGTGTGCTCTTCCGATCTTGTAAAACGACGGCC |

axxxxxxxx: sequence showing the well index from D501 to D508. byyyyyyyy: sequence showing the well index from D701 to D712. cxxxxxxxx: sequence showing the plate index from D501 to D508. dyyyyyyyy: sequence showing the plate index from D701 to D712.
